# Supplementary material for: A novel approach to characterization of a relatively unstable intercalation compound under ambient conditions: revisiting a kaolinite-acetone intercalation compound
Source: Royal Society of Chemistry journal article supplement (doi:10.1039/d1dt00337b), 2021-01-01
Supplement: d1dt00337b1.pdf [file d1dt00337b1.pdf]

**Electrical Supporting Information**

**A novel approach to characterization of a relatively  
unstable intercalation compound under ambient conditions:  
revisiting a kaolinite-acetone intercalation compound**

*Shingo Machida<sup>a,b</sup>, Régis Guégan<sup>c</sup> and Yoshiyuki Sugahara<sup>b,d\*</sup>*

<sup>a</sup>Department of Material Science and Technology, Faculty of Industrial Science and Technology, Tokyo University of Science,  
6-3-1 Nijjuku, Katsushika-ku, Tokyo 125-8585, Japan

<sup>b</sup>Kagami Memorial Institute for Materials Science and Technology, Waseda University, 2-8-26 Nishiwaseda, Shinjuku-ku,  
Tokyo 169-0051, Japan

<sup>c</sup>Global Center for Science and Engineering, Waseda University, 3-4-1 Okubo, Shinjuku-ku, Tokyo 169-8555, Japan

<sup>d</sup>Department of Applied Chemistry, School of Advanced Science and Engineering, Waseda University, 3-4-1 Okubo,  
Shinjuku-ku, Tokyo 169-8555, Japan

## Figures S

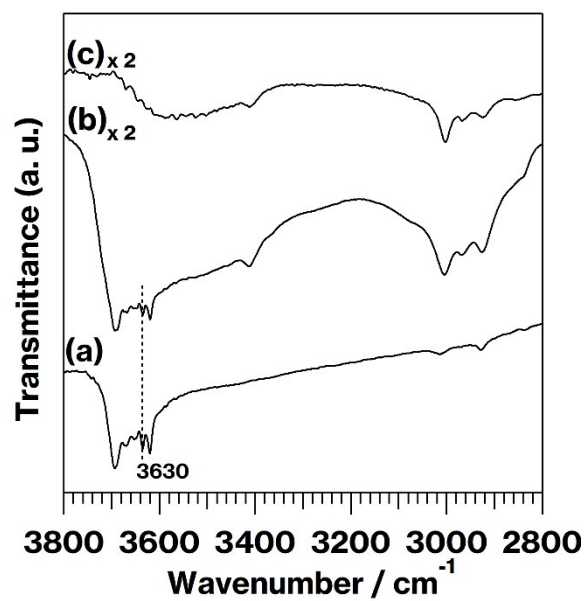

Figure S1. FTIR spectra in the 3800-2800  $\text{cm}^{-1}$  range of (a) Acetone/Kaol-NMF\_paste\_to\_dried, (b) Acetone/Kaol-NMF\_paste and (c) acetone.

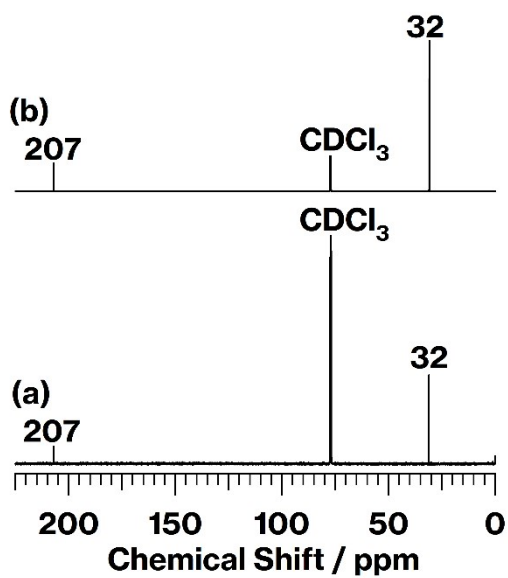

Figure S2. The  $^{13}\text{C}$  NMR spectra of (a) acetone in  $\text{CDCl}_3$  and (b) Acetone\_ext\_  $\text{CDCl}_3$ .
